# Supplementary material
Source: MDPI journal article supplement (https://www.mdpi.com/2073-4395/14/4/869)
Supplement: s1 [file s1 › agronomy-2954635-supplementary.pdf]

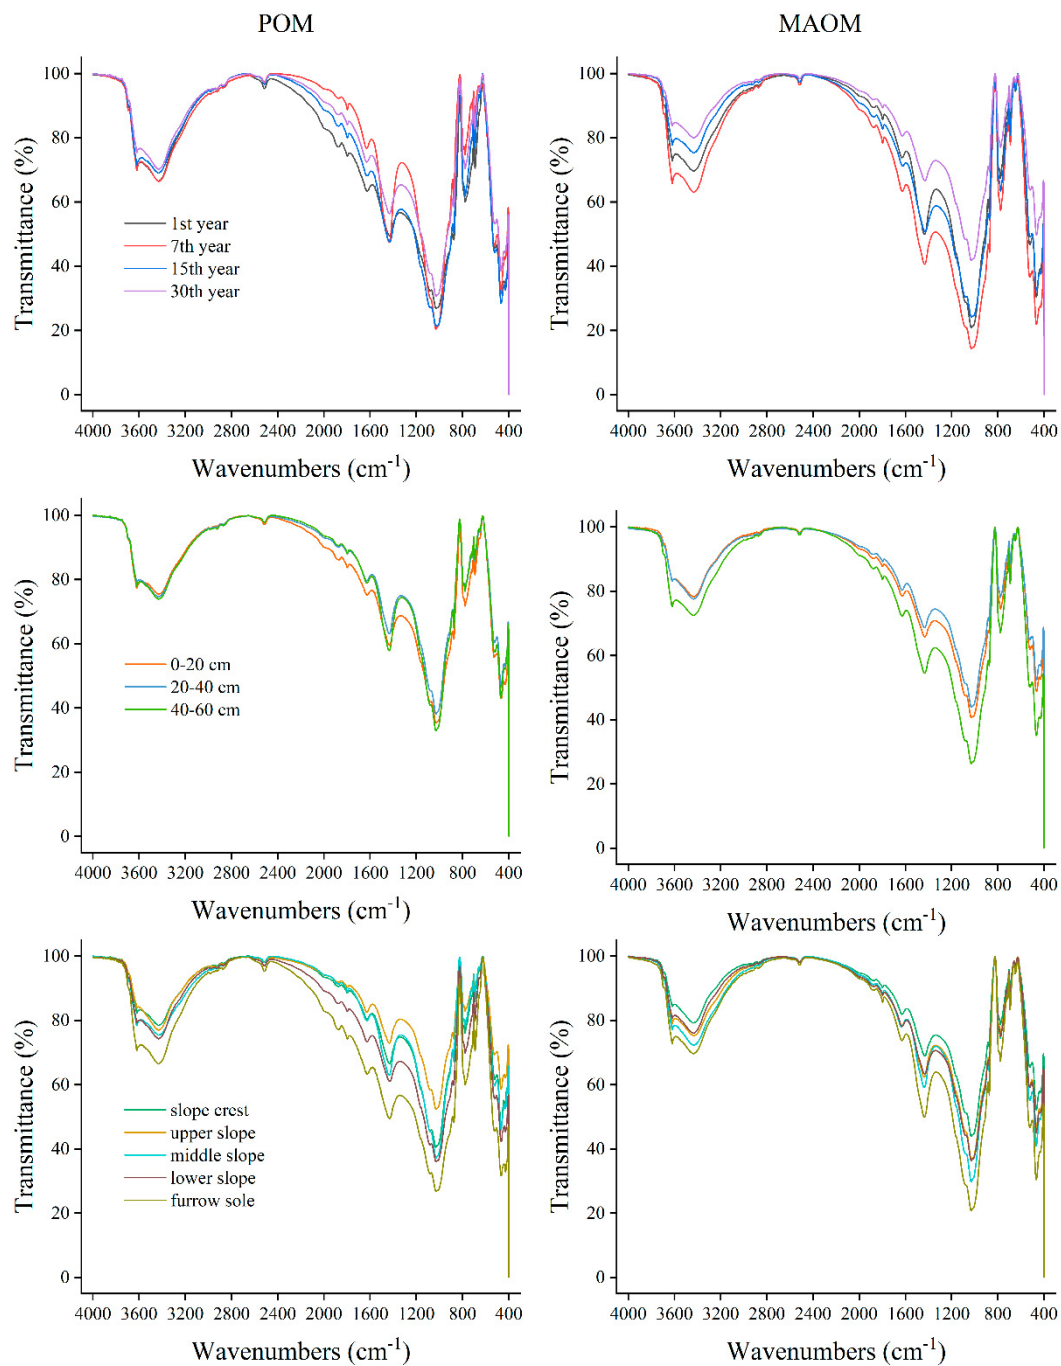

**Figure S1.** Typical FTIR spectra for POM and MAOM fractions with different reclamation years, soil depths and soil sampling positions.

**Table S1.** The specific peak areas of four functional groups in POM and MAOM fractions by FTIR with different soil depths.

|                    | Soil Depths |             |             |
|--------------------|-------------|-------------|-------------|
|                    | 0–20 cm     | 20–40 cm    | 40–60 cm    |
| <b>POM</b>         |             |             |             |
| alcohol C–OH/C–NH  | 6.5 ± 0.4   | 5.9 ± 0.4   | 6.2 ± 0.4   |
| aliphatic C–H      | 0.15 ± 0.02 | 0.16 ± 0.03 | 0.14 ± 0.02 |
| aromatic C=C/C=N   | 8.5 ± 2     | 4.9 ± 1     | 4.1 ± 2     |
| polysaccharide C–O | 16 ± 3      | 12 ± 1      | 14 ± 2      |
| <b>MAOM</b>        |             |             |             |
| alcohol C–OH/C–NH  | 6.2 ± 1     | 6.3 ± 1     | 6.4 ± 1     |
| aliphatic C–H      | 0.16 ± 0.03 | 0.13 ± 0.01 | 0.14 ± 0.01 |
| aromatic C=C/C=N   | 8.8 ± 0.8   | 9.0 ± 0.8   | 8.7 ± 0.9   |
| polysaccharide C–O | 15 ± 1      | 15 ± 0.9    | 15 ± 1      |

Values are mean ± standard error. No statistical significance was found for any of the conditions compared at the level of  $p < 0.05$ .

**Table S2.** The specific peak areas of four functional groups in POM and MAOM fractions by FTIR with different soil sampling positions.

|                    | Soil sampling positions |             |              |             |             |
|--------------------|-------------------------|-------------|--------------|-------------|-------------|
|                    | Slope crest             | Upper slope | Middle slope | Lower slope | Furrow sole |
| <b>POM</b>         |                         |             |              |             |             |
| alcohol C–OH/C–NH  | 5.8 ± 0.4               | 6.2 ± 0.4   | 6.5 ± 0.5    | 6.1 ± 0.5   | 6.6 ± 0.7   |
| aliphatic C–H      | 0.15 ± 0.03             | 0.20 ± 0.05 | 0.15 ± 0.02  | 0.11 ± 0.02 | 0.13 ± 0.03 |
| aromatic C=C/C=N   | 6.33 ± 2                | 7.93 ± 2    | 6.22 ± 1     | 3.50 ± 1    | 6.64 ± 3    |
| polysaccharide C–O | 12 ± 1                  | 14 ± 1      | 19 ± 6       | 13 ± 2      | 13 ± 2      |
| <b>MAOM</b>        |                         |             |              |             |             |
| alcohol C–OH/C–NH  | 6.2 ± 0.3               | 6.6 ± 0.5   | 6.2 ± 0.5    | 5.9 ± 0.4   | 6.6 ± 0.6   |
| aliphatic C–H      | 0.14 ± 0.02             | 0.14 ± 0.01 | 0.13 ± 0.01  | 0.18 ± 0.05 | 0.13 ± 0.02 |
| aromatic C=C/C=N   | 8.7 ± 0.7               | 7.7 ± 0.4   | 8.8 ± 1      | 9.0 ± 1     | 11 ± 2      |
| polysaccharide C–O | 15 ± 1                  | 14 ± 0.5    | 15 ± 1       | 14 ± 2      | 18 ± 2      |

Values are mean ± standard error. No statistical significance was found for any of the conditions compared at the level of  $p < 0.05$

**Table S3.** Soil organic matter water repellence (W), hydrophobicity index (HI), and degree of decomposition (DDI) of POM and MAOM fractions with different soil depths.

|             | Soil Depths |              |              |
|-------------|-------------|--------------|--------------|
|             | 0-20 cm     | 20-40 cm     | 40-60 cm     |
| <b>POM</b>  |             |              |              |
| W           | 0.28 ± 0.02 | 0.27 ± 0.02  | 0.24 ± 0.02  |
| HI          | 0.01 ± 0    | 0.10 ± 0.02  | 0.01 ± 0     |
| DDI         | 4.0 ± 0.3   | 3.9 ± 0.2    | 4.4 ± 0.2    |
| <b>MAOM</b> |             |              |              |
| W           | 0.21 ± 0.01 | 0.21 ± 0.01  | 0.20 ± 0.01  |
| HI          | 0.010 ± 0   | 0.050 ± 0.02 | 0.020 ± 0.01 |
| DDI         | 5.1 ± 0.2   | 5.0 ± 0.3    | 5.3 ± 0.2    |

Values are mean ± standard error. No statistical significance was found for any of the conditions compared at the level of  $p < 0.05$ .

**Table S4.** Soil organic matter water repellence (W), hydrophobicity index (HI), and degree of decomposition (DDI) of POM and MAOM fractions with different soil sampling positions.

|             | Soil Sampling Positions |             |              |              |              |
|-------------|-------------------------|-------------|--------------|--------------|--------------|
|             | Slope crest             | Upper slope | Middle slope | Lower slope  | Furrow sole  |
| <b>POM</b>  |                         |             |              |              |              |
| W           | 0.27 ± 0.02             | 0.27 ± 0.02 | 0.28 ± 0.03  | 0.24 ± 0.02  | 0.28 ± 0.02  |
| HI          | 0.010 ± 0               | 0.010 ± 0   | 0.020 ± 0    | 0.16 ± 0.02  | 0.010 ± 0    |
| DDI         | 4.0 ± 0.3               | 3.9 ± 0.3   | 3.9 ± 0.3    | 4.4 ± 0.3    | 4.1 ± 0.4    |
| <b>MAOM</b> |                         |             |              |              |              |
| W           | 0.19 ± 0.01             | 0.19 ± 0.01 | 0.22 ± 0.02  | 0.20 ± 0.01  | 0.23 ± 0.01  |
| HI          | 0.010 ± 0               | 0.010 ± 0   | 0.020 ± 0    | 0.050 ± 0.02 | 0.040 ± 0.01 |
| DDI         | 5.4 ± 0.3               | 5.5 ± 0.3   | 5.0 ± 0.3    | 5.0 ± 0.3    | 4.6 ± 0.3    |

Values are mean ± standard error. No statistical significance was found for any of the conditions compared at the level of  $p < 0.05$ .
